# Supplementary material for: Local genetic context shapes the function of a gene regulatory network
Source: eLife journal article supplement (doi:10.7554/elife.65993), 2021-03-08
Supplement: supp [file elife-65993-supp-v1.zip]

Archive with 15 entries (15 files):
- elife_poa_e65993_Transparent_Reporting_File.docx
- elife_poa_e65993_Figure_1_figure_supplement_1.pdf
- elife_poa_e65993_Figure_1_figure_supplement_2.pdf
- elife_poa_e65993_Figure_1_figure_supplement_3.pdf
- elife_poa_e65993_Figure_1_figure_supplement_4.pdf
- elife_poa_e65993_Figure_1_figure_supplement_5.pdf
- elife_poa_e65993_Figure_4_figure_supplement_1.pdf
- elife_poa_e65993_Figure_4_figure_supplement_2.pdf
- elife_poa_e65993_Figure_5_figure_supplement_1.pdf
- elife_poa_e65993_Figure_5_figure_supplement_2.pdf
- elife_poa_e65993_Figure_6_figure_supplement_1.pdf
- elife_poa_e65993_Supplementary_file_1.docx
- elife_poa_e65993_Supplementary_file_2.docx
- elife_poa_e65993_Supplementary_file_3.docx
- elife_poa_e65993_Supplementary_file_4.docx
