# Supplementary material for: Local genetic context shapes the function of a gene regulatory network
Source: eLife journal article supplement (doi:10.7554/elife.65993), 2021-03-08

# A. Network interactions

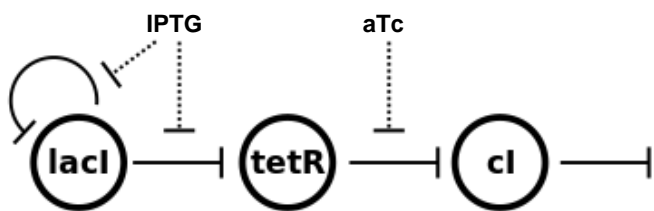

$$\frac{dL}{dt} = \underbrace{k_L - (1 - l_1) \frac{L}{K_L + L}}_{L'} - \delta L + r_X^L$$

$$\frac{dT}{dt} = \underbrace{k_L - (1 - l_1) \frac{L}{K_L + L}}_{T'} - \delta T + r_X^T$$

$$\frac{dC}{dt} = \underbrace{k_C - (1 - l_2) \frac{T}{K_T + T}}_{C'} - \delta C + r_X^C$$

# B. Transcriptional read-through

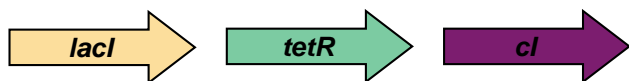

$$r_{L \rightarrow T \rightarrow C}^L = 0$$

$$r_{L \rightarrow T \rightarrow C}^T = \mu L'$$

$$r_{L \rightarrow T \rightarrow C}^C = \mu T'$$

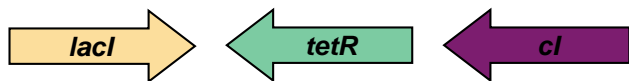

$$r_{L \leftarrow T \leftarrow C}^L = 0$$

$$r_{L \leftarrow T \leftarrow C}^T = \mu C'$$

$$r_{L \leftarrow T \leftarrow C}^C = 0$$

# C.

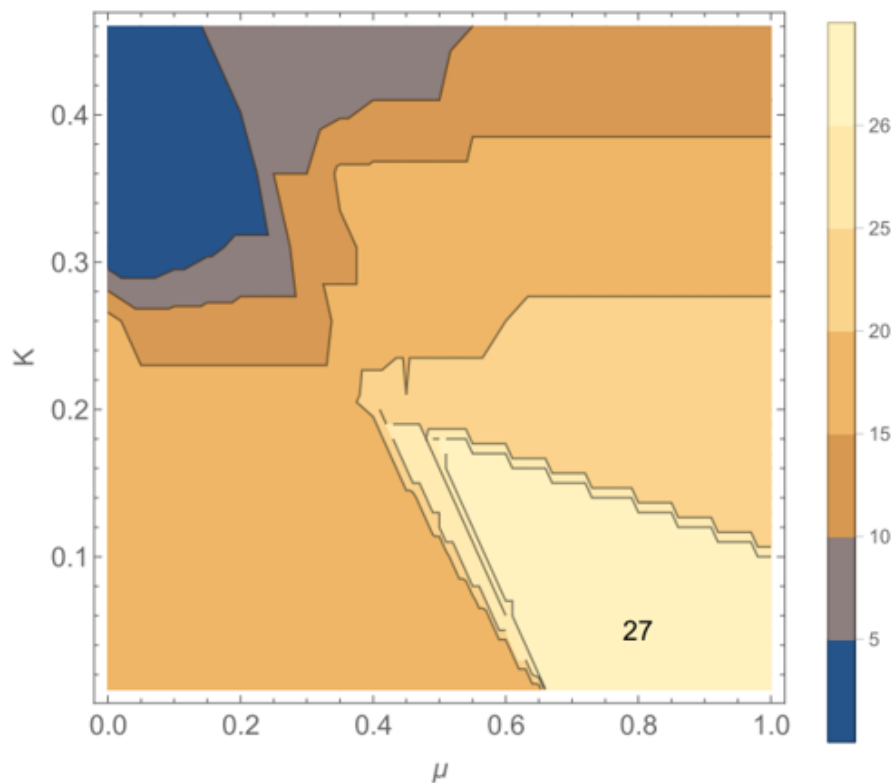

Supplement: supp [file elife-65993-supp-v1.zip › elife_poa_e65993_Figure_1_figure_supplement_1.pdf]
