# Supplementary material for: Local genetic context shapes the function of a gene regulatory network
Source: eLife journal article supplement (doi:10.7554/elife.65993), 2021-03-08

A. Phenotype independent of plasmid elements and predicted by the model

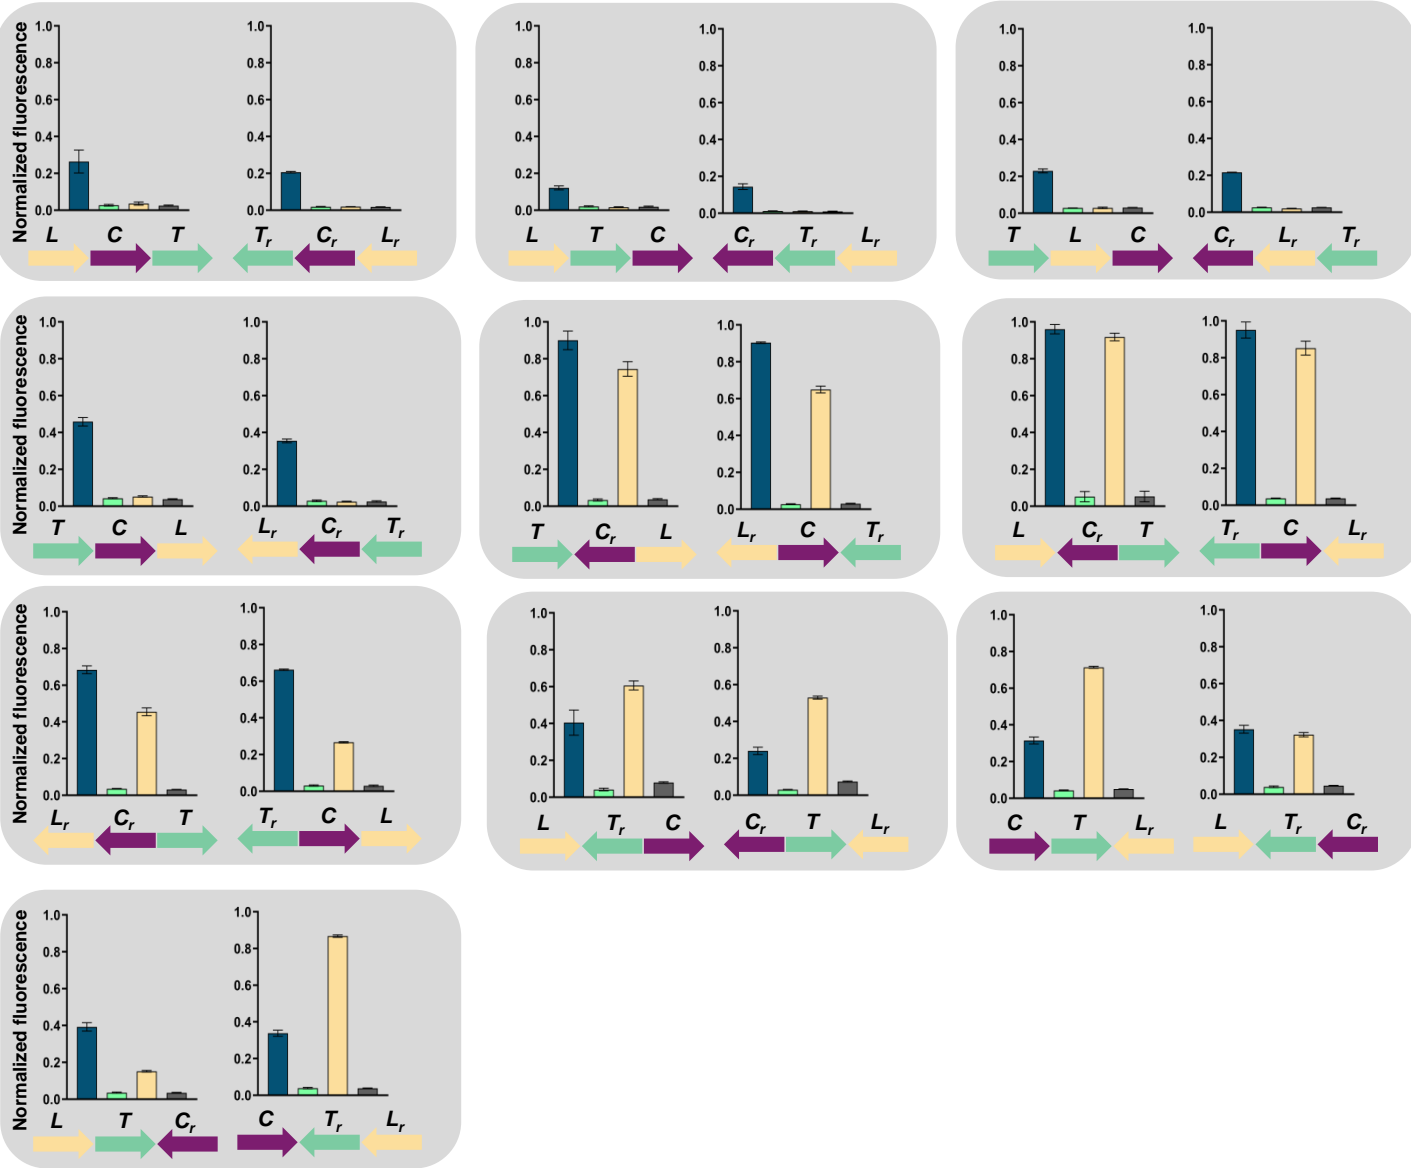

B. Phenotype independent of plasmid elements and not consistent with model predictions

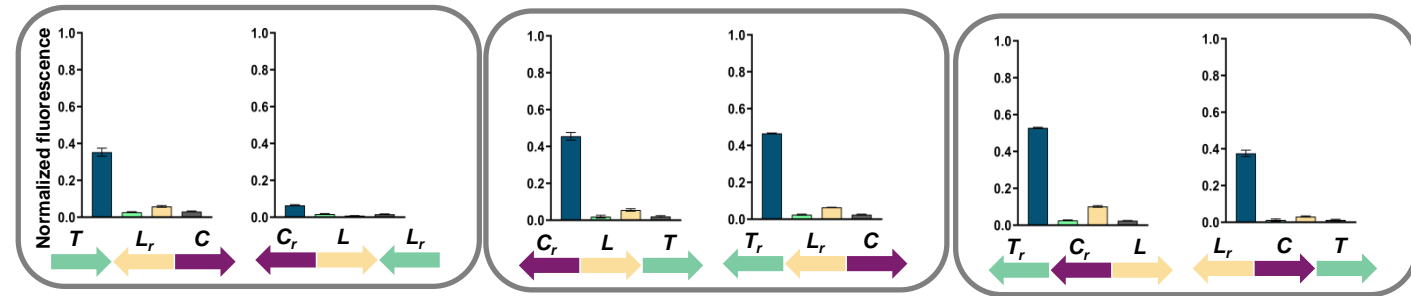

Supplement: supp [file elife-65993-supp-v1.zip › elife_poa_e65993_Figure_1_figure_supplement_2.pdf]
