# Supplementary material for: Local genetic context shapes the function of a gene regulatory network
Source: eLife journal article supplement (doi:10.7554/elife.65993), 2021-03-08

A.

| IPTG<br>aTc  | -<br>-     | -<br>+    | +<br>-    | +<br>+     |
|--------------|------------|-----------|-----------|------------|
| NOT<br>(aTc) | On         | Off       | On        | Off        |
| NOR          | On         | Off       | Off       | Off        |
| ANDN         | Off<br>Off | Off<br>On | On<br>Off | Off<br>Off |
| ALL ON       | On         | On        | On        | On         |
| NAND         | On         | On        | On        | Off        |
| ORN          | On<br>On   | On<br>Off | Off<br>On | On<br>On   |

B.

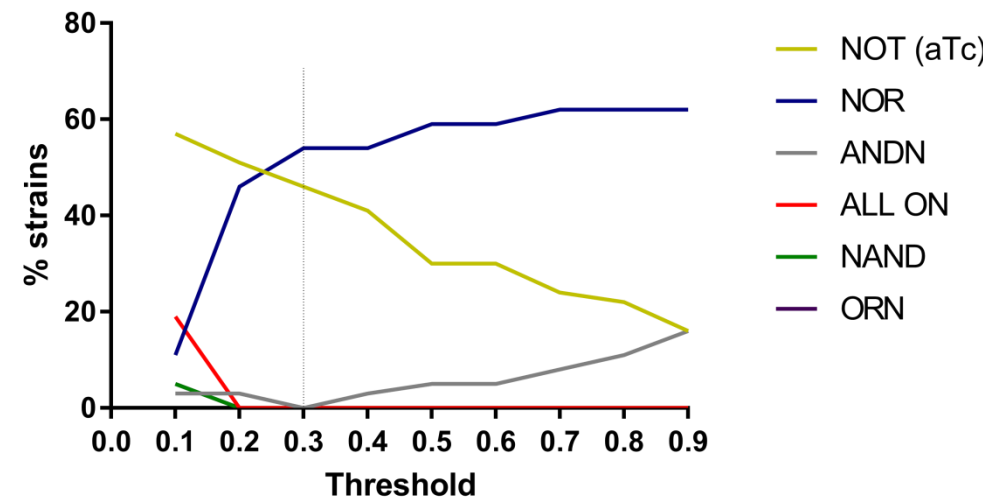

Supplement: supp [file elife-65993-supp-v1.zip › elife_poa_e65993_Figure_1_figure_supplement_5.pdf]
