# Supplementary material for: Local genetic context shapes the function of a gene regulatory network
Source: eLife journal article supplement (doi:10.7554/elife.65993), 2021-03-08
Supplement: supp [file elife-65993-supp-v1.zip › elife_poa_e65993_Supplementary_file_1.docx]

**Supplementary File 1.** Strains used in this study.

| **Name** | **Genotypea** | **Source** |
| --- | --- | --- |
| DH5α | F–*,Φ80lacZ*Δ*M15,* Δ*(lacZYA-argF), U169, recA1, endA1, hsdR17 (rK–, mK+), phoA supE44, thi-1, gyrA96, relA1, λ–* | Laboratory stock |
| DH5α λ*pir*+ | F– *,Φ80lacZ*Δ*M15,* Δ*(lacZYA-argF), U169, recA1, endA1, hsdR17 (rK–, mK+), phoA supE44, thi-1, gyrA96, relA1, λpir+* | Laboratory stock |
| HG105 | MG1655 Δ*lacZYA* Δ*lacI* | (Garcia et al., 2011) |
| JW0336 | F–, Δ(*araD*-*araB*)567, Δ*lacZ*4787(::*rrnB*-3), Δ*lacI*785::kan, λ*–*, *rph*-1, Δ(*rhaD*-*rhaB*)568, *hsdR*514 | (Baba et al., 2006) |
| MG1655 | F-, λ-, *ilvG*-, *rfb*-50, *rph*-1 | Laboratory stock |
| TB201 | MG1655 attP21::PR-*yfp* | (Pleška et al., 2016) |
| Frag1B | F–, *lacZ82*(Am), λ*–*, *rha-4,* *thiE*, *gal-33, PN25/tetR placiq/lacI SpR* | Laboratory stock |
| Frag1D | F–, *lacZ82*(Am), λ*–*, *rha-4,* *thiE*, *gal-33, PN25/tetR placiq/lacI SpR*,Δ*recA* | Laboratory stock |
| ASE023 | MG1655 attP21::PR-*yfp* Δ*lacI*785Δ*lacZ*4787::*rrnB*-3 | This study |
| ASE030 | MG1655 attP21::PR-*yfp* Δ*lacI*785Δ*lacZ*4787::*rrnB*-3 Δ*recA* attHK022::PlacO1-*lacI* attλ::PlacO1-*tetR* *old*::PtetO1-*cI* CamR | This study |
| ASE031 | MG1655 attP21::PR-*yfp* Δ*lacI*785 Δ*lacZ*4787::*rrnB*-3 attHK022::PLtetO1-*cI*-PLlacO1-*tetR-*PLlacO1-*lacI*(CTL) | This study |
| ASE032 | MG1655 attP21::PR-*yfp* Δ*lacI*785 Δ*lacZ*4787::*rrnB*-3 attHK022::PLlacO1-*lacI*-PLtetO1-*cI-*PLlacO1-*tetR* (LCT) | This study |
| ASE033 | MG1655 attP21::PR-*yfp* Δ*lacI*785 Δ*lacZ*4787::*rrnB*-3 attHK022::PLlacO1-*tetR*-PLlacO1-*lacI-*PLtetO1-*cI* (TLC) | This study |
| ASE039 | MG1655 Δ*lacZYA* Δ*lacI* attλ::Plac-131-410-*yfp* | This study |
| ASE041 | MG1655 P*lac*::CamR-FRT | This study |
| ASE046 | MG1655 Δ*lacZYA* Δ*lacI* attλ::Plac-131-410-*yfp* *fhlC*::*lacI* | This study |
| ASE047 | MG1655 Δ*lacZYA* Δ*lacI* attλ::Plac-131-410-*yfp yeaH::lacI* | This study |
| ASE048 | MG1655 Δ*lacZYA* Δ*lacI* attλ::Plac-131-410-*yfp asnT::lacI* | This study |
| KT131 | MG1655 attP21::PR-*yfp* Δ*lacI*785Δ*lacZ*4787::*rrnB*-3 Δ*recA* | This study |
| KT132 | MG1655 Δ*lacI*785Δ*lacZ*4787::*rrnB*-3 Δ*recA* | This study |

a Amp – ampicillin resistance, Kan – kanamycin resistance, Sp – spectinomycin resistance, Cam – chloramphenicol resistance
