# Supplementary material for: Local genetic context shapes the function of a gene regulatory network
Source: eLife journal article supplement (doi:10.7554/elife.65993), 2021-03-08
Supplement: supp [file elife-65993-supp-v1.zip › elife_poa_e65993_Supplementary_file_3.docx]

**Supplementary File 3. Plasmids used in this study.**

| **Name** | **Descriptiona** | **Primers and enzymes used for cloning** | **Source** |
| --- | --- | --- | --- |
| pAS014 | *pSC101* ori*, AmpR, PLlacO1-*tetR* (T) | AS104/AS105; XhoI+XbaI | This study |
| pAS015 | *pSC101* ori*, AmpR, PLlacO1-*lacI* (L) | AS104/AS105; XhoI+XbaI | This study |
| pAS016 | *pSC101* ori*, AmpR, PLtetO1-*cI* (C) | AS106/AS107; XhoI+XbaI | This study |
| pAS017 | *R6K* ori, KanR, *attPλ*, P*lac*-*mCherry* | AS096/AS097; PstI+SmaI | This study |
| pAS019 | *pSC101* ori*, KanR, *mCherry* | AS135/AS136; ScaI+EcoRI | This study |
| pAS020 | *pSC101* ori*, AmpR, PLlacO1-*lacI*-T*crp*-T1 | AS142/AS143; XbaI | This study |
| pAS021 | *pSC101* ori*, AmpR, PLlacO1-*lacI*-T*tonB*-T1 | AS144/AS145; XbaI | This study |
| pAS022 | *R6K* ori, CamR-*frt*, *attPλ*, PLlacO1-*tetR* (from pKT11) | BamHI+SphI | This study |
| pAS023 | *pSC101* ori*, AmpR, PLtetO1(A-11C, T-7G)-*cI* | AS171/AS172 | This study |
| pAS024 | *pSC101* ori*, AmpR, PLtetO1(A-11C, T-7G)-*yfp* | AS171/AS172 | This study |
| pAS026 | *pSC101* ori*, KanR, PLlacO1-*tetR*-PLlacO1-*lacI-*PLtetO1(A-11C, T-7G)-*cI* | AS098/AS099, AS100/AS101, AS102/AS103; BglI | This study |
| pAS035 | *pSC101* ori*, KanR, *yfp*rev | AS129/AS195; BglI | This study |
| pAS036 | *pSC101* ori*, KanR, PLtetO1-*yfp* | AS098/AS103; BglI | This study |
| pAS037 | *pSC101* ori*, KanR, PLtetO1-*yfp*rev | AS129/AS134; BglI | This study |
| pAS038 | *pSC101* ori*, AmpR, PLlacO1-*lacI*-T1T2 | XbaI | This study |
| pAS039 | *pSC101* ori*, KanR, PLlacO1-*tetR*-PLlacO1-*lacI-T1T2-*PLtetO1-*cI* | AS098/AS099, AS100/AS282, AS102/AS103; BglI | This study |
| pAS040 | *pSC101* ori*, KanR, PLlacO1-*lacI-*T*crp-*T1-PLlacO1-*lacI-*PLtetO1-*cI* | AS098/AS099, AS100/AS101, AS102/AS103; BglI | This study |
| pAS041 | *pSC101* ori*, KanR, T1-*yfp* | SalI | This study |
| pAS042 | *pSC101* ori*, KanR, T*crp*-*yfp* | AS283/AS284;SalI | This study |
| pAS043 | *pSC101* ori*, KanR, T*tonB*-*yfp* | AS285/AS286;SalI | This study |
| pAS045 | *pSC101* ori*, KanR, PLlacO1-*lacI*-PLtetO1(A-11C,T-7G)-*cI*-PLlacO1-*tetR* | AS098/AS099, AS100/AS101, AS102/AS103; BglI | This study |
| pAS046 | *pSC101* ori*, KanR, PLlacO1-*tetRr*-PLtetO1(A-11C,T-7G)-*cIr-*PLlacO1-*lacIr* | AS129/AS130, AS131/AS132, AS133/AS134; BglI | This study |
| pAS047 | *pSC101* ori*, KanR, PLlacO1-*tetR*-PLtetO1(A-11C,T-7G)-*cI-*PLlacO1-*lacI* | AS098/AS099, AS100/AS101, AS102/AS103; BglI | This study |
| pAS050 | *pSC101* ori*, KanR, PLtetO1(A-11C,T-7G)-*cIr-*PLlacO1-*lacIr-*PLlacO1-*tetRr* | AS129/AS130, AS131/AS132, AS133/AS134; BglI | This study |
| pAS051 | *pSC101* ori*, KanR, PLlacO1-*lacIr-*PLtetO1(A-11C,T-7G)-*cIr-* PLlacO1-*tetRr* | AS129/AS130, AS131/AS132, AS133/AS134; BglI | This study |
| pAS053 | *pSC101* ori*, KanR, PLlacO1-*tetR*-PLlacO1-*lacI-*T*crp-*PLtetO1-*cI* | AS098/AS099, AS100/AS147, AS102/AS103; BglI | This study |
| pAS055 | *pSC101* ori*, KanR, PLlacO1-*tetR*-PLlacO1-*lacI-*T*tonB-*PLtetO1-*cI* | AS098/AS099, AS100/AS153, AS102/AS103; BglI | This study |
| pCC01 | *R6K* ori, CamR-*frt*, *attP*λ,P*lac*-*yfp* | AS198/AS199; EcoRI+SphI | This study |
| pKT10 | *pSC101* ori*, KanR | XhoI+SalI | This study |
| pKT11 | *R6K* ori, CamR-*frt*, *attPP21*, PLlacO1-*tetR* | KTp90/KTp91; BamHI+SphI | This study |
| pKT12 | *R6K* ori, CamR-*frt*, *attPHK022*, PLlacO1-*lacI* | KTp90/KTp91; BamHI+SphI | This study |
| D052 | *pSC101* ori*, AmpR, PLlacO1-*lacIf*-PLtetO1-*cI-*PLlacO1-*lacI-*PR-*gfp* |  | (Guet et al., 2002) |
| pN1 | *pSC101* ori*, KanR, PLtetO1-*cI*-PLlacO1-*lacI-*PLlacO1-*tetR* (CLT) | AS098/AS099, AS100/AS101, AS102/AS103; BglI | This study |
| pN2 | *pSC101* ori*, KanR, PLtetO1-*cI*-PLlacO1-*tetR-*PLlacO1-*lacI* (CTL) | This study |
| pN3 | *pSC101* ori*, KanR, PLlacO1-*lacI*-PLtetO1-*cI-*PLlacO1-*tetR* (LCT) | This study |
| pN4 | *pSC101* ori*, KanR, PLlacO1-*lacI*-PLlacO1-*tetR-*PLtetO1-*cI* (LTC) | This study |
| pN5 | *pSC101* ori*, KanR, PLlacO1-*tetR-*PLtetO1-*cI-*PLlacO1-*lacI* (TCL) | This study |
| pN6 | *pSC101* ori*, KanR, PLlacO1-*tetR*-PLlacO1-*lacI-*PLtetO1-*cI* (TLC) | This study |
| pN9 | *pSC101* ori*, KanR, PLlacO1-*lacI*-PLtetO1-*cIr-*PLlacO1-*tetR* (LCrT) | AS098/AS099, KTp46/AS132, AS102/AS103; BglI | This study |
| pN10 | *pSC101* ori*, KanR, PLlacO1-*lacI*-PLlacO1-*tetRr-*PLtetO1-*cI* (LTrC) | This study |
| pN11 | *pSC101* ori*, KanR, PLlacO1-*tetR*-PLtetO1-*cIr-*PLlacO1-*lacI* (TCrL) | This study |
| pN12 | *pSC101* ori*, KanR, PLlacO1-*tetR*-PLlacO1-*lacIr-*PLtetO1-*cI* (TLrC) | This study |
| pN13 | *pSC101* ori*, KanR, PLtetO1-*cI*-PLlacO1-*lacI-*PLlacO1-*tetRr* (CLTr) | AS098/AS099, AS100/KTp45, AS133/AS134; BglI | This study |
| pN14 | *pSC101* ori*, KanR, PLtetO1-*cI*-PLlacO1-*tetR-*PLlacO1-*lacIr* (CTLr) | This study |
| pN16 | *pSC101* ori*, KanR, PLlacO1-*lacI*-PLlacO1-*tetR-*PLtetO1-*cIr* (LTCr) | This study |
| pN18 | *pSC101* ori*, KanR, PLlacO1-*tetR*-PLlacO1-*lacI-*PLtetO1-*cIr* (TLCr) | This study |
| pN19 | *pSC101* ori*, KanR, PLtetO1-*cI*-PLlacO1-*lacIr-*PLlacO1-*tetRr* (CLrTr) | AS098/AS099, KTp46/AS132, AS133/AS134; BglI | This study |
| pN20 | *pSC101* ori*, KanR, PLtetO1-*cI*-PLlacO1-*tetRr-*PLlacO1-*lacIr* (CTrLr) | This study |
| pN21 | *pSC101* ori*, KanR, PLlacO1-*lacI*-PLtetO1-*cIr-*PLlacO1-*tetRr* (LCrTr) | This study |
| pN22 | *pSC101* ori*, KanR, PLlacO1-*lacI*-PLlacO1-*tetRr-*PLtetO1-*cIr* (LTrCr) | This study |
| pN23 | *pSC101* ori*, KanR, PLlacO1-*tetR*-PLtetO1-*cIr-*PLlacO1-*lacIr* (TCrLr) | This study |
| pN24 | *pSC101* ori*, KanR, PLlacO1-*tetR*-PLlacO1-*lacIr-*PLtetO1-*cIr* (TLrCr) | This study |
| pN25 | *pSC101* ori*, KanR, PLtetO1-*cIr*-PLlacO1-*lacIr-*PLlacO1-*tetRr* (CrLrTr) | AS129/AS130, AS131/AS132, AS133/AS134; BglI | This study |
| pN26 | *pSC101* ori*, KanR, PLtetO1-*cIr*-PLlacO1-*tetRr-*PLlacO1-*lacIr* (CrTrLr) | This study |
| pN27 | *pSC101* ori*, KanR, PLlacO1-*lacIr*-PLtetO1-*cIr-*PLlacO1-*tetRr* (LrCrTr) | This study |
| pN28 | *pSC101* ori*, KanR, PLlacO1-*lacIr*-PLlacO1-*tetRr-*PLtetO1-*cIr* (LrTrCr) | This study |
| pN29 | *pSC101* ori*, KanR, PLlacO1-*tetRr*-PLtetO1-*cIr-*PLlacO1-*lacIr* (TrCrLr) | This study |
| pN30 | *pSC101* ori*, KanR, PLlacO1-*tetRr*-PLlacO1-*lacIr-*PLtetO1-*cIr* (TrLrCr) | This study |
| pN33 | *pSC101* ori*, KanR, PLlacO1-*lacIr*-PLtetO1-*cIr-*PLlacO1-*tetR* (LrCrT) | AS129/AS130, AS131/AS132,  AS102/AS103; BglI | This study |
| pN34 | *pSC101* ori*, KanR, PLlacO1-*lacIr*-PLlacO1-*tetRr-*PLtetO1-*cI* (LrTrC) | This study |
| pN35 | *pSC101* ori*, KanR, PLlacO1-*tetRr*-PLtetO1-*cIr-*PLlacO1-*lacI* (TrCrL) | This study |
| pN36 | *pSC101* ori*, KanR, PLlacO1-*tetRr*-PLlacO1-*lacIr-*PLtetO1-*cI* (TrLrC) | This study |
| pN37 | *pSC101* ori*, KanR, PLtetO1-*cIr*-PLlacO1-*lacI-*PLlacO1-*tetR* (CrLT) | AS129/AS130, AS100/AS101, AS102/AS103; BglI | This study |
| pN39 | *pSC101* ori*, KanR, PLlacO1-*lacIr*-PLtetO1-*cI-*PLlacO1-*tetR* (LrCT) | This study |
| pN41 | *pSC101* ori*, KanR, PLlacO1-*tetRr*-PLtetO1-*cI-*PLlacO1-*lacI* (TrCL) | This study |
| pN43 | *pSC101* ori*, KanR, PLtetO1-*cIr*-PLlacO1-*lacI-*PLlacO1-*tetRr* (CrLTr) | AS129/AS130, AS100/KTp45, AS133/AS134; BglI | This study |
| pN44 | *pSC101* ori*, KanR, PLtetO1-*cIr*-PLlacO1-*tetR-*PLlacO1-*lacIr* (CrTLr) | This study |
| pN45 | *pSC101* ori*, KanR, PLlacO1-*lacIr*-PLtetO1-*cI-*PLlacO1-*tetRr* (LrCTr) | This study |
| pN47 | *pSC101* ori*, KanR, PLlacO1-*tetRr*-PLtetO1-*cI-*PLlacO1-*lacIr* (TrCLr) | This study |
| pN49 | *pSC101* ori*, KanR, PLtetO1-*yfp*-PLlacO1-*lacI-*PLlacO1-*tetR* (VLT) | AS098/AS099, AS100/AS101, AS102/AS103; BglI | This study |
| pN54 | *pSC101* ori*, KanR, PLlacO1-*tetR*-PLlacO1-*lacI-*PLtetO1-*yfp* (TLV) | This study |
| pZS*12-*gfp* | *pSC101* ori*, AmpR, PLlacO1-*gfp* |  | Laboratory stock |
| pZS*2R-*gfp* | *pSC101* ori*, KanR, PR-*gfp* |  | Laboratory stock |
| pZS*11-*yfp* | *pSC101* ori*, AmpR, PLtetO1-*yfp* |  | Laboratory stock |
| pZA31-CFP | *P15A ori*, CamR, PLtetO1-*cfp* |  | Laboratory stock |
| pLA2 | *R6K ori*, KanR, *attPλ* |  | (Haldimann and Wanner, 2001) |
| pBS3Clux | *pMB1 ori*, AmpR, P*lac*-*mCherry*, *luxABCDE* |  | (Radeck et al., 2013) |
| pKD3 | *R6K ori*, CamR-*frt*, AmpR |  | (Datsenko and Wanner, 2000) |
| pKD13 | *R6K ori*, KanR-*frt*, AmpR |  | (Datsenko and Wanner, 2000) |
| pAH68-frt-cat | *R6K* ori, CamR-*frt*, *attPHK022* |  | (Pleška et al., 2016) |
| pAH120-frt-cat | *R6K* ori, CamR-*frt*, *attPλ* |  | (Pleška et al., 2016) |

a Amp – ampicillin resistance, Kan – kanamycin resistance, Cam – chloramphenicol resistance
