# Supplementary material for: Local genetic context shapes the function of a gene regulatory network
Source: eLife journal article supplement (doi:10.7554/elife.65993), 2021-03-08
Supplement: supp [file elife-65993-supp-v1.zip › elife_poa_e65993_Supplementary_file_4.docx]

**Supplementary File 4. ANOVA test statistics.**

| **IPTG [mM]** | **F(DFn, DFd)** | **P value** |
| --- | --- | --- |
| 0 | F2,24=1.957 | P=0.1632 |
| 0.1 | F2,24=14.87 | P<0.0001 |
| 0.2 | F2,24=13.08 | P=0.0001 |
| 0.3 | F2,18=22.53 | P<0.0001 |
| 0.4 | F2,21=7.345 | P=0.0038 |
| 1 | F2,24=4.500 | P=0.0219 |
