# Supplementary figures and images for: Local genetic context shapes the function of a gene regulatory network
Source: eLife journal article supplement (doi:10.7554/elife.65993), 2021-03-08

A. Phenotype influenced by plasmid elements

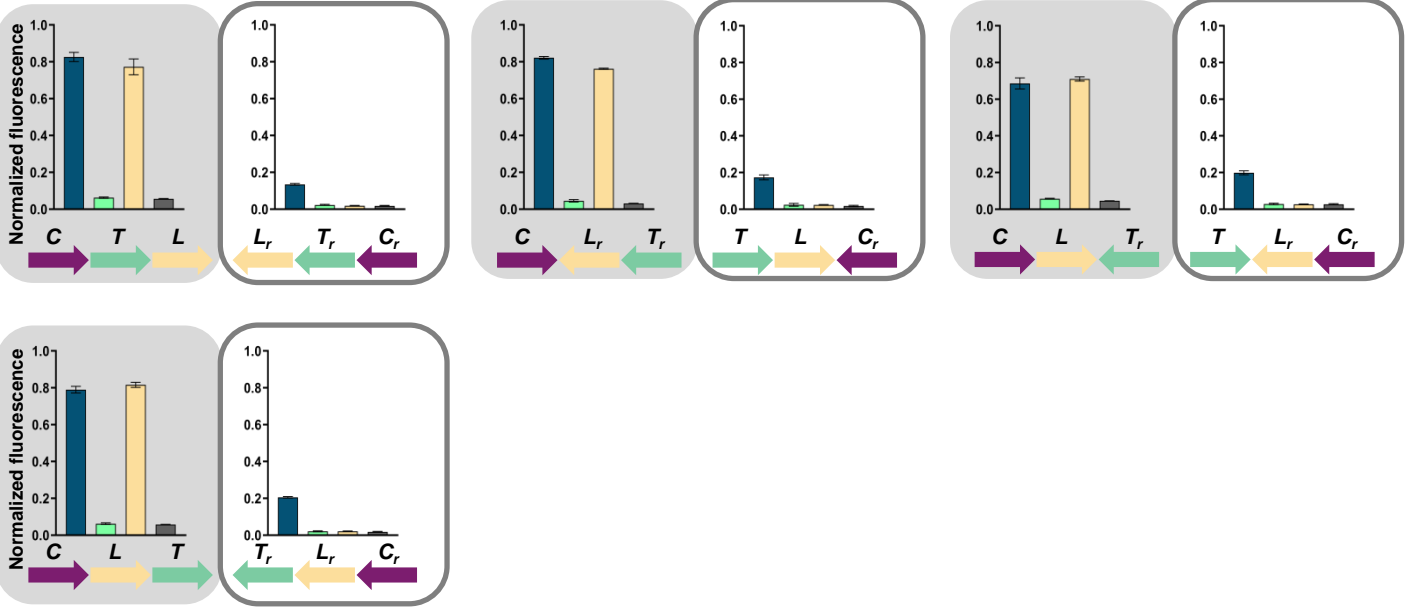

B. Respective pair not cloned

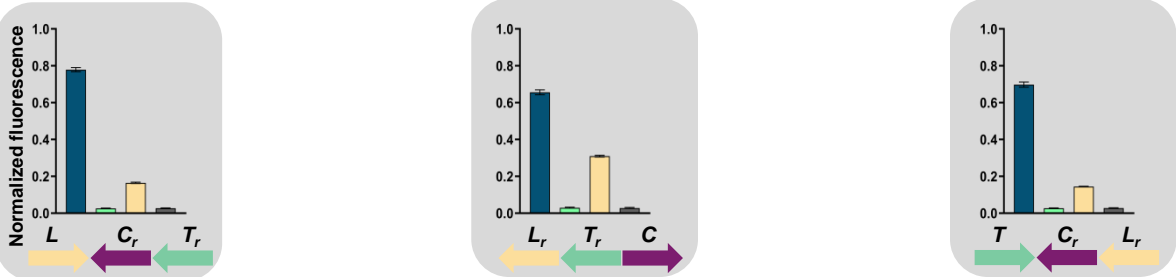

Supplement: supp [file elife-65993-supp-v1.zip › elife_poa_e65993_Figure_1_figure_supplement_3.pdf]

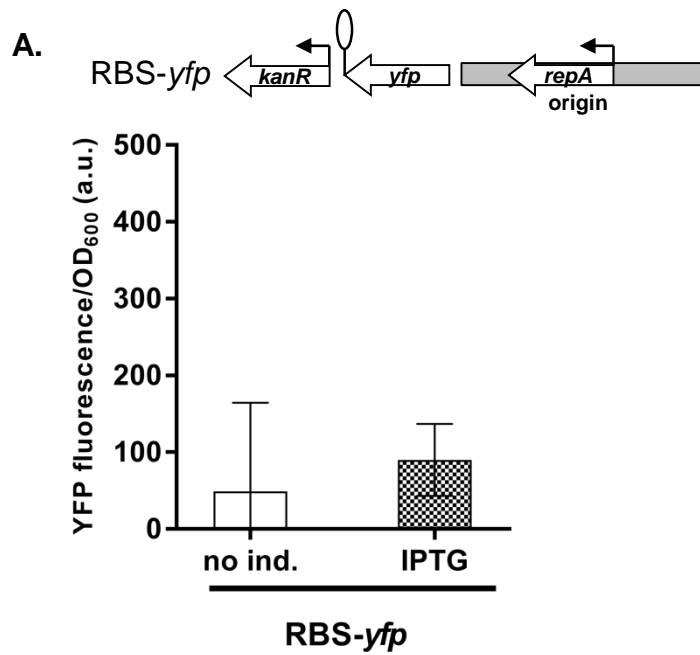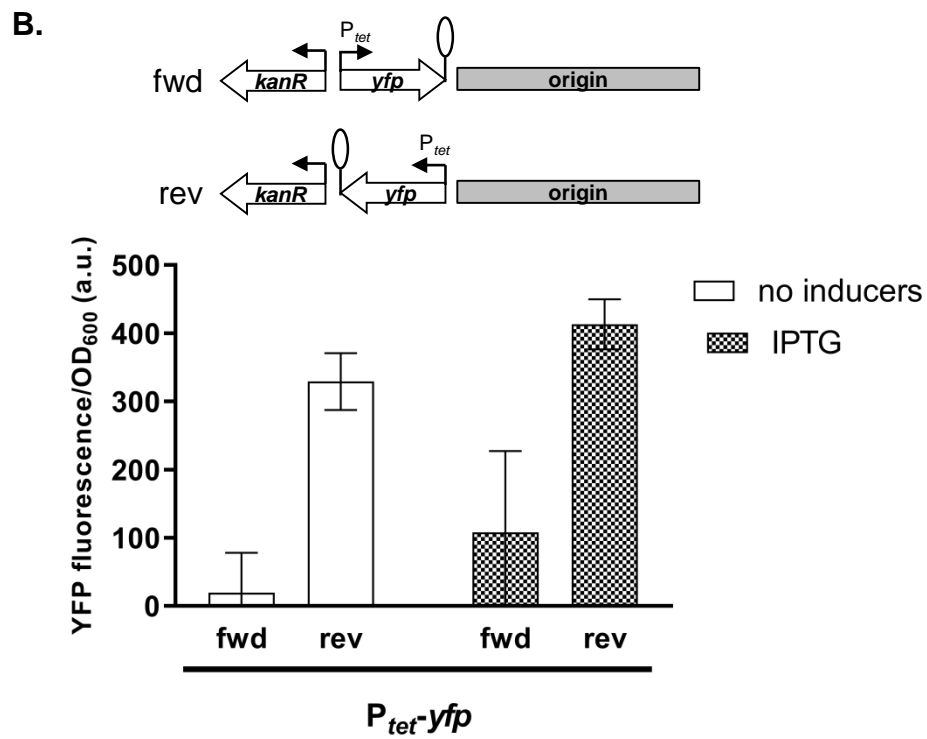

Supplement: supp [file elife-65993-supp-v1.zip › elife_poa_e65993_Figure_1_figure_supplement_4.pdf]

A.

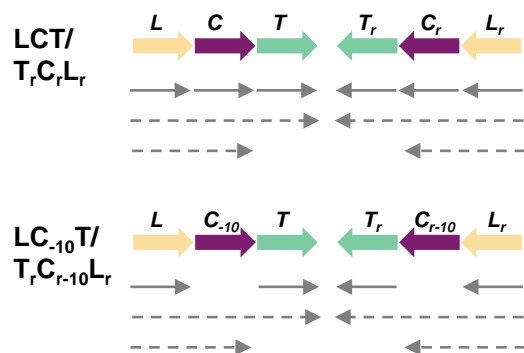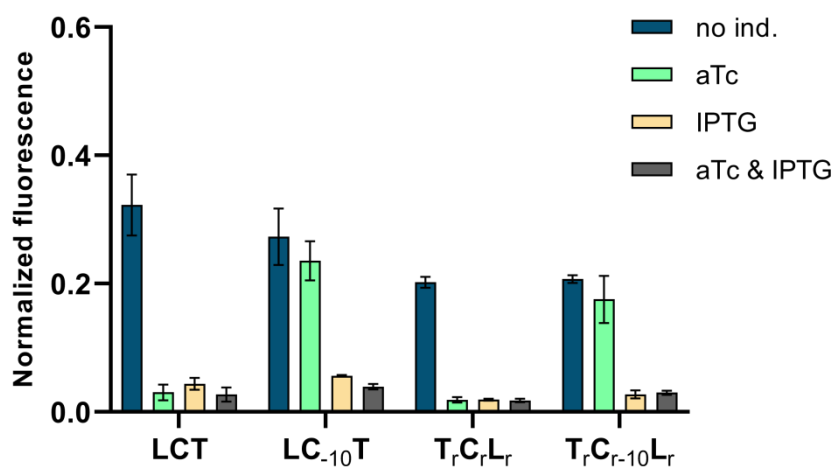

B.

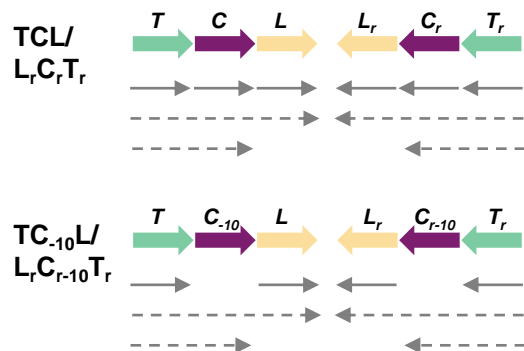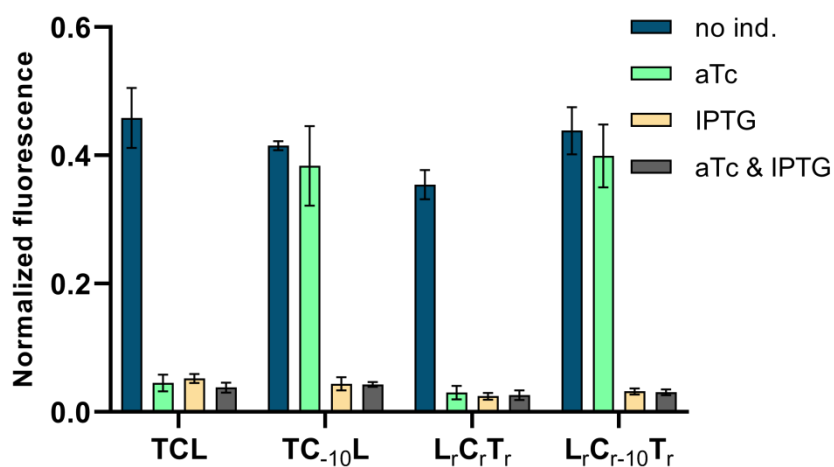

C.

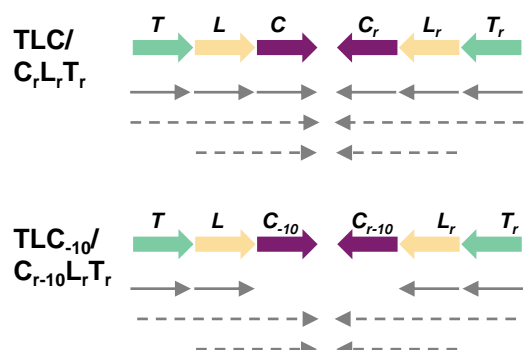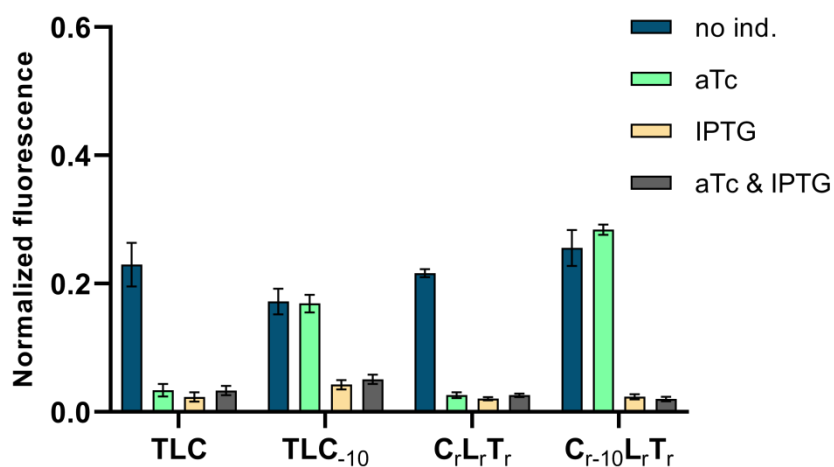

Supplement: supp [file elife-65993-supp-v1.zip › elife_poa_e65993_Figure_4_figure_supplement_1.pdf]

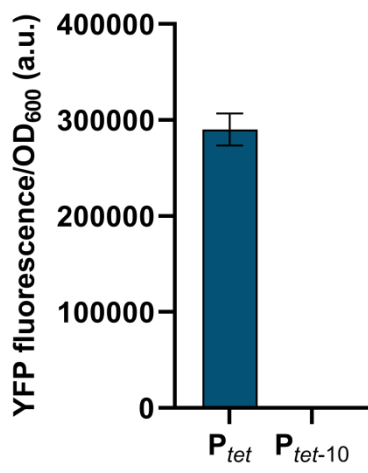

Supplement: supp [file elife-65993-supp-v1.zip › elife_poa_e65993_Figure_4_figure_supplement_2.pdf]

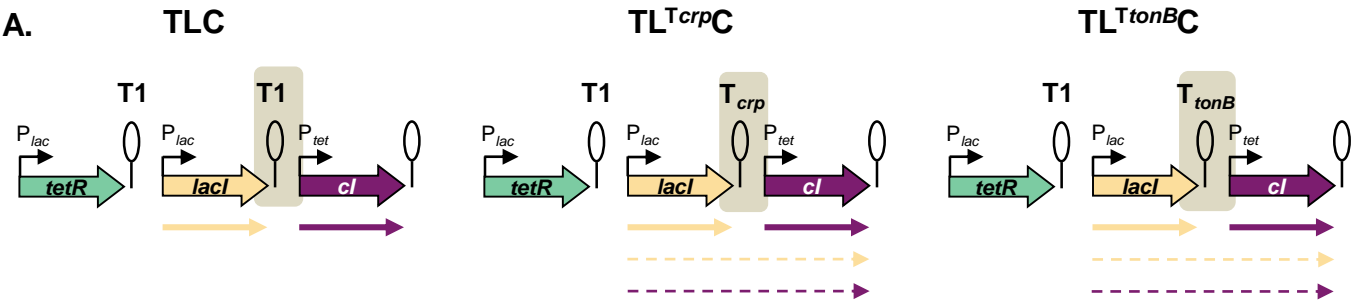

Supplement: supp [file elife-65993-supp-v1.zip › elife_poa_e65993_Figure_5_figure_supplement_1.pdf]

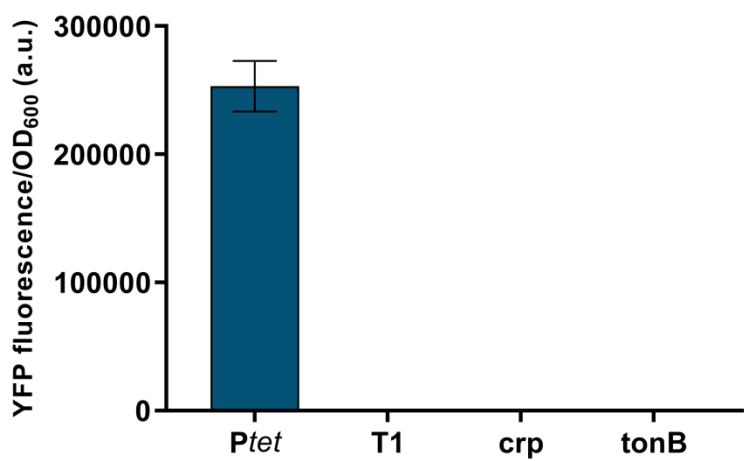

Supplement: supp [file elife-65993-supp-v1.zip › elife_poa_e65993_Figure_5_figure_supplement_2.pdf]

**IPTG 0 mM**

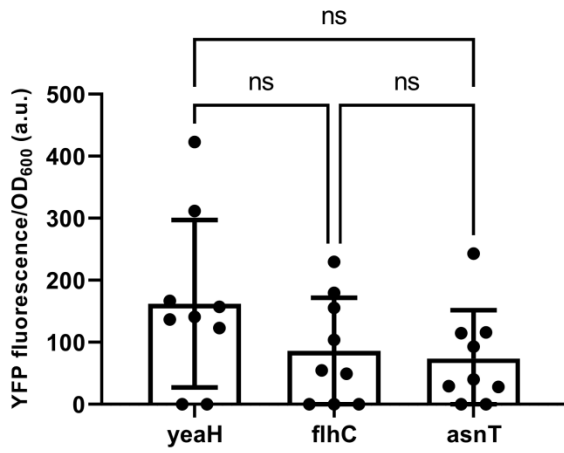

**IPTG 0.1 mM**

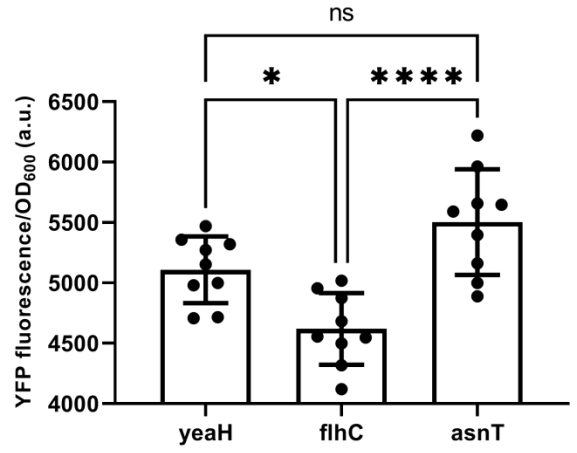

**IPTG 0.2 mM**

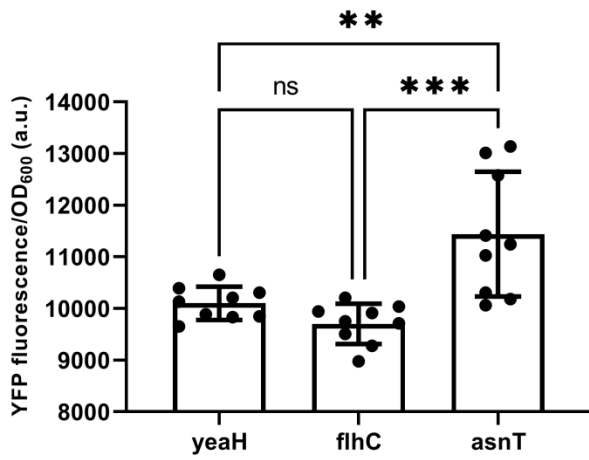

**IPTG 0.3 mM**

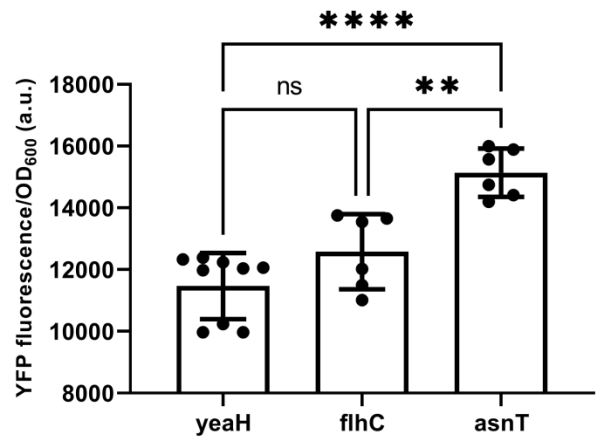

**IPTG 0.4 mM**

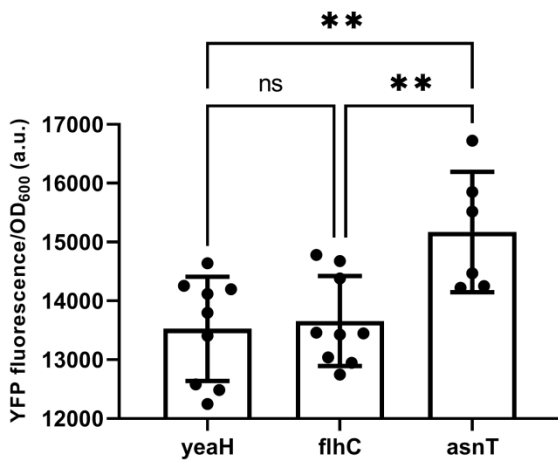

**IPTG 1 mM**

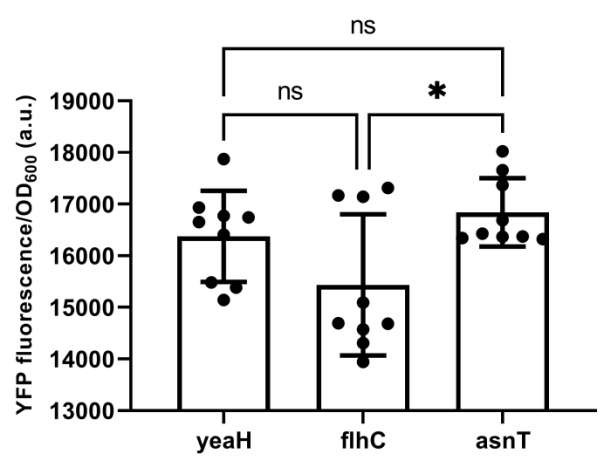

Supplement: supp [file elife-65993-supp-v1.zip › elife_poa_e65993_Figure_6_figure_supplement_1.pdf]
